# Supplementary material for: De novo Assembly of the Grass Carp Ctenopharyngodon idella Transcriptome to Identify miRNA Targets Associated with Motile Aeromonad Septicemia
Source: PLoS One. 2014 Nov 19;9(11):e112722. doi: 10.1371/journal.pone.0112722 (PMC4237362; doi:10.1371/journal.pone.0112722)
Supplement: Table S5 — 188 genes as the predicted target genes of 9 different expression miRNA between SG and RG groups of C. idella. (XLSX) [file pone.0112722.s005.xlsx]

## Sheet: Table S5
Gene_id	Gene_length	readcount_SG	readcount_RG	FPKM_SG	FPKM_RG	value1	value2	log2(Fold_change)	log2(Fold_change) normalized	z-score	p-value	q-value(Benjamini et al. 1995)	q-value(Storey et al. 2003)	Signature(q-value(Storey et al. 2003) < 0.01)	up/down	miRNA of regulates the corresponding transcript
comp52516_c1	1313	61690.5	172	765.268	2.52962	1227.06	2.71978	8.8175	8.2409	31.0066	4.3907e-211	7.7718e-208	7.7718e-208	TRUE	down	miR-217
comp62633_c0	2536	9959.89	176.98	63.9683	1.34762	198.107	2.79853	6.14547	5.56888	13.3767	8.27866e-41	3.71922e-38	3.71922e-38	TRUE	down	miR-217
comp60613_c0	2337	3110.95	64	21.6817	0.528826	61.8784	1.01201	5.93414	5.35754	7.46047	8.62166e-14	1.25915e-11	1.25915e-11	TRUE	down	novel-154
comp57134_c0	3438	98596.4	3594.45	467.105	20.1891	1961.13	56.8378	5.10869	4.5321	40.9992	0	0	0	TRUE	down	miR-142a-3p
comp61646_c0	3529	122837	5808.94	566.939	31.7861	2443.29	91.8548	4.73332	4.15673	44.7962	0	0	0	TRUE	down	novel-3
comp71218_c5	4703	92157.8	5867.11	319.166	24.0902	1833.07	92.7746	4.30438	3.72779	37.4809	1.88483e-307	4.90627e-304	4.90627e-304	TRUE	down	miR-217, miR-223
comp62084_c1	1322	4534.36	324	55.8656	4.73266	90.1907	5.1233	4.13783	3.56124	8.17337	2.99894e-16	5.49514e-14	5.49514e-14	TRUE	down	miR-142a-3p
comp60951_c1	1267	1318.39	96	16.9483	1.46314	26.2234	1.51802	4.1106	3.534	4.39418	1.11194e-05	0.00060747	0.00060747	TRUE	down	novel-3
comp67199_c0	2417	1358.8	101	9.15669	0.80693	27.0272	1.59708	4.08091	3.50431	4.44635	8.73423e-06	0.000488317	0.000488317	TRUE	down	novel-3
comp40425_c0	2893	81877	6110.09	460.97	40.7841	1628.57	96.6168	4.07519	3.4986	34.4995	8.16603e-261	1.76273e-257	1.76273e-257	TRUE	down	miR-21
comp40438_c0	1970	2287.08	185	18.9093	1.81341	45.4912	2.92534	3.95891	3.38231	5.6867	1.29521e-08	1.15905e-06	1.15905e-06	TRUE	down	novel-154, miR-217
comp63672_c0	6923	115832	9440.86	272.517	26.3335	2303.96	149.285	3.94797	3.37138	40.4273	0	0	0	TRUE	down	novel-154, miR-223, novel-3, miR-217, let-7i, novel-115
comp71167_c0	2845	57113.1	4751.9	326.974	32.2535	1136.01	75.1402	3.91825	3.34165	28.2784	6.36477e-176	9.08551e-173	9.08551e-173	TRUE	down	miR-217
comp71243_c9	3172	20675.7	1787.42	106.166	10.8814	411.251	28.2639	3.86299	3.28639	16.8925	5.10634e-64	3.34761e-61	3.34761e-61	TRUE	down	novel-115
comp66736_c1	4324	3505.44	363	13.2043	1.62111	69.725	5.74	3.60255	3.02596	6.69977	2.08749e-11	2.52045e-09	2.52045e-09	TRUE	down	novel-154
comp72940_c0	987	5086.22	537	83.9339	10.5063	101.168	8.4914	3.5746	2.998	8.03454	9.39279e-16	1.6364e-13	1.6364e-13	TRUE	down	miR-142a-3p
comp30678_c0	2521	11198.1	1251	72.3487	9.58243	222.736	19.7816	3.4931	2.9165	11.7627	6.07513e-32	2.27825e-29	2.27825e-29	TRUE	down	miR-217
comp64018_c0	2460	19285.8	2240.85	127.692	17.5901	383.605	35.4338	3.43642	2.85983	15.2865	9.40477e-53	5.33558e-50	5.33558e-50	TRUE	down	miR-21
comp44758_c0	2613	5346.88	623	33.3289	4.60405	106.352	9.85129	3.43239	2.8558	8.04288	8.77483e-16	1.53478e-13	1.53478e-13	TRUE	down	miR-142a-3p
comp53822_c0	4400	32706.1	3849.65	121.07	16.8951	650.541	60.8732	3.41776	2.84116	19.8419	1.29561e-87	1.12417e-84	1.12417e-84	TRUE	down	novel-3, novel-154
comp68355_c0	3045	32932.1	4034.96	176.154	25.5884	655.036	63.8035	3.35987	2.78327	19.7013	2.10124e-86	1.77111e-83	1.77111e-83	TRUE	down	miR-217
comp62332_c1	1525	10316.2	1285.69	110.182	16.2801	205.195	20.3302	3.3353	2.75871	10.9753	5.02645e-28	1.72425e-25	1.72425e-25	TRUE	down	novel-3
comp70573_c1	5318	28965	3673.17	88.7125	13.3378	576.129	58.0826	3.31021	2.73362	18.3036	7.74609e-75	5.61928e-72	5.61928e-72	TRUE	down	let-7i, miR-21
comp70962_c0	5656	3417.65	446.1	9.84187	1.52305	67.9788	7.05403	3.26857	2.69197	6.23584	4.49352e-10	4.82049e-08	4.82049e-08	TRUE	down	let-7i
comp52301_c0	2879	1842	246	10.421	1.65	36.6383	3.88992	3.23554	2.65895	4.54777	5.42167e-06	0.000314852	0.000314852	TRUE	down	miR-142a-3p
comp69160_c0	4435	3332.01	455.1	12.2369	1.98155	66.2754	7.19634	3.20314	2.62654	6.07607	1.23166e-09	1.26751e-07	1.26751e-07	TRUE	down	miR-223
comp67207_c0	4668	2618.86	362	9.13779	1.49751	52.0905	5.72418	3.18588	2.60928	5.36735	7.99006e-08	6.26345e-06	6.26345e-06	TRUE	down	miR-223
comp68905_c0	3744	16180.4	2251.84	70.3904	11.6143	321.837	35.6076	3.17607	2.59948	13.3144	1.90922e-40	8.44858e-38	8.44858e-38	TRUE	down	miR-217
comp67874_c0	3936	7182.27	1067.97	29.7212	5.23957	142.859	16.8875	3.08057	2.50397	8.68712	3.71748e-18	7.74137e-16	7.74137e-16	TRUE	down	novel-154, novel-3
comp64986_c0	2291	4690.79	699.91	33.3488	5.89941	93.3022	11.0674	3.07559	2.49899	7.01253	2.34054e-12	3.01961e-10	3.01961e-10	TRUE	down	novel-3
comp73127_c0	2677	11098	1671.9	67.524	12.0602	220.746	26.4372	3.06175	2.48515	10.7526	5.76113e-27	1.88147e-24	1.88147e-24	TRUE	down	miR-217
comp53453_c0	2951	1850.01	280	10.2109	1.83223	36.7976	4.42755	3.05503	2.47844	4.38323	1.16933e-05	0.000636856	0.000636856	TRUE	down	miR-21, novel-3
comp66430_c2	4479	4272.3	665.01	15.536	2.86707	84.9782	10.5156	3.01456	2.43797	6.59838	4.1567e-11	4.85971e-09	4.85971e-09	TRUE	down	miR-217
comp71268_c0	3577	6901.22	1089.92	31.4244	5.88392	137.269	17.2345	2.99363	2.41703	8.34456	7.14778e-17	1.35751e-14	1.35751e-14	TRUE	down	novel-154, novel-115
comp64191_c0	2469	2629	429	17.3432	3.35527	52.2922	6.78363	2.94646	2.36987	5.09121	3.55795e-07	2.5171e-05	2.5171e-05	TRUE	down	novel-115, novel-3
comp67542_c0	9895	113192	19093.1	186.32	37.2608	2251.45	301.913	2.89865	2.32205	33.0183	4.43763e-239	8.72764e-236	8.72764e-236	TRUE	down	novel-3, miR-217, novel-113, novel-115, miR-21, miR-142a-3p
comp68297_c0	3155	4077.18	690	21.0484	4.22319	81.0972	10.9107	2.8939	2.31731	6.25637	3.94034e-10	4.24248e-08	4.24248e-08	TRUE	down	miR-217
comp71906_c0	1692	2936.99	503	28.2723	5.74062	58.4182	7.95377	2.87671	2.30011	5.2863	1.24817e-07	9.49844e-06	9.49844e-06	TRUE	down	miR-142a-3p
comp67881_c0	1964	22456.4	3863.88	186.234	37.9904	446.669	61.0982	2.87	2.29341	14.5928	3.12164e-48	1.63476e-45	1.63476e-45	TRUE	down	miR-21
comp70608_c3	3601	20046.2	3527.74	90.671	18.9175	398.729	55.783	2.83751	2.26092	13.6688	1.56027e-42	7.34513e-40	7.34513e-40	TRUE	down	novel-3
comp57113_c0	3002	2464.44	436.15	13.3711	2.80554	49.019	6.89669	2.82936	2.25277	4.78178	1.73754e-06	0.000109139	0.000109139	TRUE	down	miR-217
comp68002_c0	2403	4965.12	883.01	33.6539	7.09583	98.7588	13.9627	2.82233	2.24573	6.77439	1.24936e-11	1.53786e-09	1.53786e-09	TRUE	down	miR-223
comp35004_c0	1565	2301.01	409.56	23.9477	5.05353	45.7683	6.47623	2.82112	2.24452	4.61017	4.02331e-06	0.000238496	0.000238496	TRUE	down	miR-223
comp68226_c0	9003	93390	16922	168.956	36.2958	1857.57	267.582	2.79537	2.21877	29.1732	4.24604e-187	6.47909e-184	6.47909e-184	TRUE	down	novel-154
comp69187_c0	4491	3919.18	734.63	14.2138	3.15876	77.9545	11.6165	2.74646	2.16987	5.89231	3.8083e-09	3.66354e-07	3.66354e-07	TRUE	down	miR-217
comp47224_c0	1828	5531.46	1072.92	49.286	11.334	110.024	16.9657	2.69712	2.12052	6.89976	5.20893e-12	6.63318e-10	6.63318e-10	TRUE	down	miR-217
comp68946_c0	3478	4448.44	864	20.8323	4.79706	88.4817	13.6621	2.6952	2.1186	6.18397	6.25101e-10	6.60183e-08	6.60183e-08	TRUE	down	miR-217, miR-142a-3p
comp70311_c7	2350	11960.9	2324.96	82.9001	19.1046	237.908	36.7638	2.69405	2.11745	10.137	3.78615e-24	1.11695e-21	1.11695e-21	TRUE	down	novel-3
comp70757_c0	8987	4558.79	887.21	8.26218	1.90635	90.6767	14.0292	2.6923	2.11571	6.25479	3.98055e-10	4.27537e-08	4.27537e-08	TRUE	down	novel-3, miR-217, novel-131, miR-21, novel-154, miR-142a-3p
comp68983_c0	1239	7726.02	1508.67	101.565	23.5133	153.674	23.8561	2.68745	2.11085	8.1309	4.26105e-16	7.74366e-14	7.74366e-14	TRUE	down	miR-223
comp34291_c0	2261	10161	1985.32	73.1974	16.9559	202.108	31.3932	2.6866	2.11	9.32229	1.13852e-20	2.79121e-18	2.79121e-18	TRUE	down	miR-223
comp70093_c0	1984	2687.35	533.83	22.0619	5.1958	53.4528	8.44127	2.66273	2.08614	4.75948	1.94095e-06	0.000121057	0.000121057	TRUE	down	miR-223
comp32930_c0	5104	8667.07	1726	27.658	6.53013	172.392	27.2927	2.65911	2.08252	8.53811	1.36434e-17	2.75682e-15	2.75682e-15	TRUE	down	miR-21, miR-217, miR-142a-3p
comp68061_c0	1367	2305.07	468.4	27.4647	6.61667	45.849	7.40665	2.63	2.0534	4.36348	1.28007e-05	0.000690373	0.000690373	TRUE	down	miR-217
comp69839_c0	3066	3177	646.29	16.8774	4.07049	63.1922	10.2196	2.62841	2.05182	5.12018	3.05243e-07	2.17687e-05	2.17687e-05	TRUE	down	miR-217, miR-142a-3p
comp66533_c1	3078	4030.41	820.56	21.3275	5.14794	80.1669	12.9752	2.62725	2.05065	5.76493	8.1694e-09	7.48464e-07	7.48464e-07	TRUE	down	miR-223, miR-217
comp71693_c6	2399	14668.7	3016.26	99.5915	24.279	291.769	47.6951	2.61291	2.03632	10.9488	6.73338e-28	2.30087e-25	2.30087e-25	TRUE	down	miR-217
comp64063_c0	3443	6767.53	1394.06	32.0149	7.81872	134.61	22.0438	2.61034	2.03374	7.43046	1.08222e-13	1.57274e-11	1.57274e-11	TRUE	down	miR-217
comp74927_c0	1600	2833.91	587	28.8487	7.08451	56.3679	9.28203	2.60236	2.02577	4.79601	1.61854e-06	0.000102099	0.000102099	TRUE	down	let-7i
comp73054_c0	2674	12341.5	2595.85	75.1737	18.746	245.479	41.0473	2.58024	2.00364	9.93766	2.85445e-23	8.14927e-21	8.14927e-21	TRUE	down	miR-142a-3p
comp66412_c1	3683	3078.09	648.22	13.6125	3.39869	61.2248	10.2501	2.57848	2.00188	4.95993	7.05186e-07	4.76784e-05	4.76784e-05	TRUE	down	miR-223, novel-131
comp31527_c0	1533	7520.32	1584	79.9013	19.9528	149.583	25.0473	2.57822	2.00163	7.75219	9.03223e-15	1.43258e-12	1.43258e-12	TRUE	down	miR-217
comp64016_c0	5028	1874.03	6405.61	6.07073	24.6012	37.2754	101.29	-1.44219	-2.01879	-7.83373	4.73598e-15	7.74765e-13	7.74765e-13	TRUE	up	miR-217, novel-115
comp68835_c1	5630	1523.99	5313.51	4.40893	18.2249	30.3129	84.0207	-1.47081	-2.04741	-7.20007	6.01824e-13	8.20697e-11	8.20697e-11	TRUE	up	novel-3, novel-131, let-7i
comp28495_c0	1924	802	2796.92	6.78936	28.0715	15.9522	44.2268	-1.47116	-2.04776	-5.22431	1.74805e-07	1.29462e-05	1.29462e-05	TRUE	up	miR-223
comp44262_c0	4319	1440.86	5045.19	5.43373	22.5572	28.6594	79.7779	-1.47698	-2.05357	-7.02953	2.07236e-12	2.6972e-10	2.6972e-10	TRUE	up	miR-223, novel-3
comp68365_c0	4828	695	2435.18	2.34464	9.73992	13.8239	38.5067	-1.47794	-2.05454	-4.88516	1.03344e-06	6.79011e-05	6.79011e-05	TRUE	up	novel-115, novel-3
comp70270_c0	5778	645	2260.98	1.8182	7.55632	12.8294	35.7521	-1.47858	-2.05517	-4.70812	2.50011e-06	0.000153551	0.000153551	TRUE	up	miR-223, miR-217
comp67585_c0	3876	558	1971.6	2.34482	9.8226	11.0989	31.1762	-1.49003	-2.06663	-4.41224	1.02305e-05	0.000563076	0.000563076	TRUE	up	miR-223
comp70156_c0	4742	1661.76	5874.68	5.70777	23.9229	33.0533	92.8943	-1.4908	-2.06739	-7.61823	2.57185e-14	3.90423e-12	3.90423e-12	TRUE	up	novel-3, miR-217, let-7i, miR-21, miR-223
comp66248_c0	3292	624	2218.68	3.08734	13.0145	12.4117	35.0832	-1.49908	-2.07568	-4.6937	2.68311e-06	0.000163994	0.000163994	TRUE	up	miR-21
comp71977_c0	2248	901.67	3224.79	6.53297	27.7011	17.9347	50.9925	-1.50753	-2.08413	-5.67347	1.39931e-08	1.24341e-06	1.24341e-06	TRUE	up	miR-217
comp52893_c0	1620	64066.6	229706	644.134	2738.09	1274.32	3632.26	-1.51114	-2.08774	-47.9872	0	0	0	TRUE	up	miR-21
comp67269_c0	6028	805.92	2891.86	2.1776	9.26393	16.0302	45.728	-1.51229	-2.08889	-5.38044	7.43021e-08	5.8714e-06	5.8714e-06	TRUE	up	miR-223
comp62654_c0	2197	1002	3600	7.42843	31.642	19.9303	56.9256	-1.51411	-2.09071	-6.00654	1.89528e-09	1.90828e-07	1.90828e-07	TRUE	up	miR-142a-3p, novel-115
comp66129_c0	2979	2928.75	10533.1	16.0129	68.2775	58.2543	166.557	-1.51557	-2.09217	-10.2792	8.74656e-25	2.63298e-22	2.63298e-22	TRUE	up	miR-142a-3p, lei-7i
comp70180_c0	4449	1951.47	7046.44	7.14429	30.5843	38.8157	111.423	-1.52133	-2.09793	-8.42206	3.69915e-17	7.19528e-15	7.19528e-15	TRUE	up	novel-3, novel-131, miR-223
comp57479_c0	3090	1857.24	6748.54	9.78969	42.1738	36.9415	106.712	-1.53042	-2.10701	-8.26476	1.39974e-16	2.61905e-14	2.61905e-14	TRUE	up	miR-21, miR-217, novel-3
comp56992_c0	4205	9208.3	33559.1	35.6675	154.112	183.158	530.658	-1.5347	-2.11129	-18.4563	4.64428e-76	3.45405e-73	3.45405e-73	TRUE	up	miR-21, miR-217, novel-154
comp70006_c0	2444	1582.57	5770.17	10.5468	45.591	31.4781	91.2418	-1.53534	-2.11194	-7.65353	1.95541e-14	3.0045e-12	3.0045e-12	TRUE	up	miR-21, miR-217, miR-223
comp66905_c0	4182	540	1973	2.10315	9.11034	10.7409	31.1984	-1.53836	-2.11496	-4.47936	7.48676e-06	0.000423658	0.000423658	TRUE	up	miR-142a-3p
comp69814_c0	5876	871.04	3227.28	2.41444	10.6059	17.3254	51.0319	-1.55851	-2.1351	-5.76334	8.24633e-09	7.53952e-07	7.53952e-07	TRUE	up	novel-3
comp66645_c3	4066	1300.98	4843.61	5.2115	23.0035	25.8772	76.5904	-1.56548	-2.14208	-7.07515	1.49286e-12	1.98085e-10	1.98085e-10	TRUE	up	miR-142a-3p, novel-115
comp71867_c0	2356	1013.67	3808.42	7.00779	31.2148	20.1624	60.2213	-1.5786	-2.1552	-6.29776	3.0198e-10	3.2914e-08	3.2914e-08	TRUE	up	miR-21
comp47840_c0	1585	746	2860.11	7.66601	34.8454	14.8383	45.226	-1.60782	-2.18442	-5.50367	3.71965e-08	3.1086e-06	3.1086e-06	TRUE	up	miR-223
comp69709_c4	2232	547	2103.03	3.99165	18.1946	10.8801	33.2545	-1.61186	-2.18845	-4.72476	2.30385e-06	0.000142188	0.000142188	TRUE	up	let-7i, miR-21, novel-154
comp67083_c0	5529	503.74	1993	1.48395	6.96069	10.0196	31.5146	-1.65319	-2.22979	-4.65292	3.2726e-06	0.000195964	0.000195964	TRUE	up	miR-21, miR-217, miR-223
comp30653_c0	2174	2047.01	8161.58	15.3363	72.4947	40.7161	129.056	-1.66433	-2.24093	-9.4449	3.5575e-21	9.0474e-19	9.0474e-19	TRUE	up	let-7i, novel-154
comp70323_c2	4343	959.36	3826.89	3.59792	17.0156	19.0822	60.5133	-1.66503	-2.24162	-6.46856	9.89423e-11	1.11693e-08	1.11693e-08	TRUE	up	novel-154
comp66195_c0	3296	426.29	1716.77	2.10658	10.0581	8.47913	27.1467	-1.67879	-2.25539	-4.34869	1.36951e-05	0.000734579	0.000734514	TRUE	up	miR-223, novel-3
comp68400_c3	5918	3342.9	13492.3	9.20043	44.0253	66.492	213.349	-1.68197	-2.25856	-12.2023	3.02284e-34	1.2216e-31	1.2216e-31	TRUE	up	miR-217
comp68783_c4	4526	2554.12	10379.5	9.1915	44.2847	50.8027	164.128	-1.69184	-2.26844	-10.7308	7.29841e-27	2.37475e-24	2.37475e-24	TRUE	up	miR-217, novel-154
comp69464_c0	5933	521.14	2128.59	1.43067	6.92802	10.3657	33.6587	-1.69916	-2.27575	-4.86879	1.12285e-06	7.32318e-05	7.32318e-05	TRUE	up	miR-142a-3p
comp68067_c3	2787	539.99	2215.94	3.15579	15.3537	10.7407	35.0399	-1.70591	-2.28251	-4.97661	6.47088e-07	4.39518e-05	4.39518e-05	TRUE	up	miR-223, miR-142a-3p, novel-3
comp69192_c2	3089	4769.12	19763	25.1466	123.545	94.8602	312.505	-1.72001	-2.2966	-14.9185	2.49704e-50	1.36417e-47	1.36417e-47	TRUE	up	novel-115
comp63962_c0	2844	1617.99	6841.9	9.26629	46.4556	32.1826	108.189	-1.74919	-2.32579	-8.84406	9.2298e-19	1.99235e-16	1.99235e-16	TRUE	up	novel-154
comp71747_c0	3267	1697.45	7357.32	8.46267	43.4872	33.7631	116.339	-1.78481	-2.36141	-9.25431	2.15618e-20	5.21388e-18	5.21388e-18	TRUE	up	miR-223, miR-142a-3p
comp71443_c3	9611	566	2487.05	0.959196	4.99698	11.258	39.3269	-1.80456	-2.38116	-5.4069	6.41249e-08	5.14995e-06	5.14995e-06	TRUE	up	miR-217
comp70043_c1	5800	428	1907.29	1.20192	6.35009	8.51314	30.1593	-1.82484	-2.40144	-4.7585	1.95035e-06	0.000121557	0.000121557	TRUE	up	let-7i, miR-21, novel-154, miR-223, miR-142a-3p, novel-3, novel-115
comp72804_c0	1544	2312	10516	24.3893	131.521	45.9869	166.287	-1.85438	-2.43097	-11.2536	2.2244e-29	7.78128e-27	7.78128e-27	TRUE	up	miR-21
comp66410_c0	1670	631.99	2888.1	6.16387	33.3954	12.5706	45.6686	-1.86115	-2.43774	-5.90683	3.48763e-09	3.38078e-07	3.38078e-07	TRUE	up	novel-154
comp68324_c0	3802	621	2845	2.66035	14.4498	12.352	44.987	-1.86476	-2.44136	-5.8676	4.4214e-09	4.20761e-07	4.20761e-07	TRUE	up	novel-3
comp62163_c1	2659	578.76	2657.99	3.54519	19.3031	11.5118	42.0299	-1.8683	-2.44489	-5.67621	1.37714e-08	1.22864e-06	1.22864e-06	TRUE	up	miR-21, novel-115, novel-3
comp69502_c1	2938	988.26	4549.88	5.47872	29.9047	19.657	71.9457	-1.87187	-2.44846	-7.43275	1.0636e-13	1.54822e-11	1.54822e-11	TRUE	up	let-7i, novel-154
comp66332_c0	7424	777.87	3634.52	1.70659	9.45367	15.4722	57.4714	-1.89316	-2.46976	-6.67621	2.45197e-11	2.92462e-09	2.92462e-09	TRUE	up	novel-3, novel-115
comp67476_c0	1906	89764.2	424446	767.079	4300.23	1785.46	6711.63	-1.91037	-2.48697	-72.5579	0	0	0	TRUE	up	miR-21
comp70733_c1	5531	337.84	1628.29	0.994871	5.68486	6.71981	25.7476	-1.93795	-2.51454	-4.51443	6.34877e-06	0.000366049	0.000366049	TRUE	up	novel-115
comp69641_c0	4198	1457.73	7170.3	5.6558	32.9827	28.995	113.382	-1.96731	-2.54391	-9.53559	1.49038e-21	3.89094e-19	3.89094e-19	TRUE	up	miR-21, miR-142a-3p, miR-217
comp71630_c0	3046	2464.74	12339.1	13.1796	78.2252	49.0249	195.115	-1.99274	-2.56933	-12.5787	2.7653e-36	1.16541e-33	1.16541e-33	TRUE	up	miR-21, miR-223
comp71138_c0	6921	296	1515	0.696598	4.22703	5.88759	23.9562	-2.02465	-2.60125	-4.43752	9.10015e-06	0.000506854	0.00050667	TRUE	up	miR-217, miR-223, novel-3, novel-154
comp72174_c0	888	10295.3	52696.1	188.836	1145.93	204.779	833.265	-2.02471	-2.60131	-26.1768	4.88915e-151	6.27108e-148	6.27108e-148	TRUE	up	miR-217
comp68139_c0	2569	594	3062.01	3.76601	23.0162	11.815	48.4185	-2.03494	-2.61154	-6.32238	2.57566e-10	2.8247e-08	2.8247e-08	TRUE	up	miR-142a-3p
comp71479_c1	4819	733	3791.45	2.47746	15.1929	14.5797	59.9529	-2.03986	-2.61646	-7.04252	1.88788e-12	2.47164e-10	2.47164e-10	TRUE	up	miR-223, miR-142a-3p
comp70080_c1	4325	1302	6849.31	4.90325	30.581	25.8974	108.306	-2.06423	-2.64083	-9.51362	1.84133e-21	4.79303e-19	4.79303e-19	TRUE	up	miR-142a-3p
comp66140_c0	3590	495	2648	2.2458	14.2434	9.8458	41.8719	-2.0884	-2.665	-5.94446	2.77365e-09	2.73055e-07	2.73055e-07	TRUE	up	miR-223, novel-131
comp69198_c1	3792	989	5321.27	4.24803	27.0981	19.6717	84.1435	-2.09673	-2.67332	-8.441	3.14642e-17	6.16078e-15	6.16078e-15	TRUE	up	miR-142a-3p
comp44713_c0	3421	1315	7091.16	6.26083	40.0272	26.156	112.13	-2.09996	-2.67656	-9.75055	1.83474e-22	5.09027e-20	5.09027e-20	TRUE	up	miR-21
comp68624_c0	1841	706.1	3900.41	6.24701	40.9117	14.0447	61.6759	-2.13468	-2.71128	-7.28123	3.30786e-13	4.62489e-11	4.62489e-11	TRUE	up	novel-3
comp71458_c1	2737	359	1984.02	2.13638	13.9979	7.14069	31.3726	-2.13537	-2.71197	-5.19372	2.06138e-07	1.50527e-05	1.50527e-05	TRUE	up	miR-21, miR-217
comp70688_c0	8633	988.02	5470.29	1.86408	12.236	19.6522	86.4999	-2.13801	-2.7146	-8.62858	6.21176e-18	1.28149e-15	1.28149e-15	TRUE	up	let-7i, miR-223, novel-154, novel-3
comp68859_c0	7742	894	5206.21	1.88081	12.9855	17.7821	82.324	-2.21089	-2.78748	-8.53524	1.39866e-17	2.80693e-15	2.80693e-15	TRUE	up	miR-217, miR-223
comp78560_c0	2690	415	2488.01	2.51279	17.8604	8.25456	39.3421	-2.25281	-2.82941	-5.94572	2.75244e-09	2.71268e-07	2.71268e-07	TRUE	up	miR-217
comp67511_c1	2683	277.96	1688.11	1.68741	12.1499	5.52877	26.6935	-2.27146	-2.84806	-4.91391	8.92773e-07	5.94084e-05	5.94084e-05	TRUE	up	novel-3
comp71626_c0	5753	208	1290.41	0.588882	4.33136	4.13723	20.4048	-2.30217	-2.87877	-4.31954	1.56357e-05	0.000826648	0.000826648	TRUE	up	miR-217, miR-223, novel-3, novel-154
comp71309_c0	7014	1013.93	6300.29	2.35452	17.3455	20.1676	99.6244	-2.30446	-2.88106	-9.54847	1.3162e-21	3.4669e-19	3.45966e-19	TRUE	up	miR-217
comp72097_c1	2495	328	2073.09	2.14123	16.045	6.52409	32.7811	-2.32902	-2.90561	-5.5004	3.78937e-08	3.16387e-06	3.16387e-06	TRUE	up	miR-217
comp70911_c1	3096	625.59	3977.68	3.29116	24.8096	12.4433	62.8977	-2.33764	-2.91423	-7.63029	2.34235e-14	3.58039e-12	3.58039e-12	TRUE	up	miR-217, miR-223
comp70703_c1	5593	697	4450.01	2.02977	15.3641	13.8637	70.3665	-2.34358	-2.92017	-8.07875	6.54322e-16	1.15588e-13	1.15588e-13	TRUE	up	miR-217, novel-3
comp69293_c3	6514	859.42	5499.9	2.14891	16.3042	17.0943	86.9681	-2.34697	-2.92357	-8.98652	2.55172e-19	5.79065e-17	5.79065e-17	TRUE	up	novel-115, novel-154, novel-3
comp70971_c0	6132	1072.73	6978.34	2.84936	21.9756	21.3371	110.346	-2.3706	-2.94719	-10.1627	2.90835e-24	8.63752e-22	8.63752e-22	TRUE	up	miR-217, novel-3
comp70058_c0	4673	269.09	1792.96	0.93791	7.40911	5.35234	28.3515	-2.40518	-2.98178	-5.18055	2.21238e-07	1.60889e-05	1.60889e-05	TRUE	up	miR-142a-3p, miR-217, novel-3
comp70028_c3	3084	458.89	3096.81	2.42356	19.3906	9.12756	48.9688	-2.42356	-3.00016	-6.82865	8.57162e-12	1.07452e-09	1.07452e-09	TRUE	up	novel-3
comp56696_c0	2641	577	3929.09	3.5585	28.7286	11.4768	62.1294	-2.43655	-3.01315	-7.70768	1.28127e-14	1.9929e-12	1.9929e-12	TRUE	up	novel-115
comp71002_c2	4971	10534.6	72050.6	34.5169	279.889	209.538	1139.31	-2.44288	-3.01948	-33.047	1.71881e-239	3.45726e-236	3.45726e-236	TRUE	up	miR-217
comp64057_c0	3518	1382.77	9788.9	6.40197	53.7316	27.504	154.789	-2.49259	-3.06918	-12.2726	1.27038e-34	5.22941e-32	5.22941e-32	TRUE	up	miR-142a-3p, miR-217, novel-3
comp69783_c0	3425	343	2459.78	1.63115	13.8684	6.82244	38.8957	-2.51125	-3.08785	-6.16932	6.85862e-10	7.20913e-08	7.20913e-08	TRUE	up	miR-142a-3p, novel-3
comp69941_c1	4174	588.36	4245.25	2.29589	19.64	11.7028	67.1287	-2.52008	-3.09667	-8.11556	4.8354e-16	8.73361e-14	8.73361e-14	TRUE	up	miR-217, miR-223
comp63750_c0	4281	625	4547.14	2.3779	20.5109	12.4316	71.9024	-2.53203	-3.10863	-8.41415	3.95762e-17	7.68117e-15	7.68117e-15	TRUE	up	novel-3
comp57257_c0	4734	272	2025	0.935837	8.26015	5.41022	32.0206	-2.56524	-3.14184	-5.64242	1.67673e-08	1.48247e-06	1.48247e-06	TRUE	up	miR-223
comp71951_c0	3458	230	1727.98	1.08333	9.64951	4.57482	27.324	-2.57838	-3.15498	-5.22211	1.769e-07	1.30795e-05	1.30795e-05	TRUE	up	novel-131, novel-154
comp60316_c0	4553	284	2160.09	1.01597	9.16148	5.6489	34.1568	-2.59613	-3.17272	-5.85347	4.81424e-09	4.55695e-07	4.55695e-07	TRUE	up	miR-21
comp69068_c3	13432	1255.22	9806.79	1.52208	14.0987	24.967	155.071	-2.63484	-3.21144	-12.5402	4.49778e-36	1.88658e-33	1.88658e-33	TRUE	up	let-7i, miR-21, miR-217, novel-131, novel-154, novel-3
comp60055_c0	1811	221	1729.59	1.98762	18.4423	4.3958	27.3494	-2.63731	-3.21391	-5.26805	1.37879e-07	1.04565e-05	1.04565e-05	TRUE	up	novel-115
comp70924_c0	5742	173.14	1397.09	0.491127	4.69843	3.44384	22.0917	-2.68141	-3.25801	-4.7631	1.90637e-06	0.000118984	0.000118984	TRUE	up	miR-223, novel-115, novel-3
comp70554_c1	2378	4004.22	32692.2	27.4262	265.475	79.646	516.952	-2.69836	-3.27495	-23.0951	5.18482e-118	5.66508e-115	5.66508e-115	TRUE	up	miR-217
comp61065_c0	2404	229.93	1890.53	1.55783	15.1859	4.57342	29.8943	-2.70852	-3.28512	-5.56069	2.68704e-08	2.29992e-06	2.29992e-06	TRUE	up	miR-142a-3p
comp43078_c0	2407	650.8	5437.07	4.40383	43.6195	12.9447	85.9746	-2.73154	-3.30814	-9.45855	3.12245e-21	8.01004e-19	8.01004e-19	TRUE	up	miR-217
comp67553_c0	3590	238.95	2154.24	1.08411	11.5875	4.75284	34.0643	-2.8414	-3.41799	-6.03538	1.58587e-09	1.60772e-07	1.60772e-07	TRUE	up	miR-217, miR-223
comp71719_c0	2528	541.82	5150.4	3.4909	39.3419	10.7771	81.4415	-2.9178	-3.4944	-9.41527	4.71866e-21	1.19319e-18	1.19319e-18	TRUE	up	miR-21
comp38538_c0	3178	44846.9	426482	229.847	2591.42	892.028	6743.82	-2.91841	-3.495	-85.7866	0	0	0	TRUE	up	miR-223, novel-154
comp36330_c1	814	7336.02	69869	146.79	1657.49	145.917	1104.82	-2.92058	-3.49718	-34.6954	9.24445e-264	2.09785e-260	2.09785e-260	TRUE	up	miR-217
comp71687_c0	5572	131.31	1264.77	0.383836	4.38321	2.61182	19.9994	-2.93683	-3.51342	-4.67562	2.9306e-06	0.000177892	0.000177892	TRUE	up	novel-115
comp70445_c1	2160	107	1057.23	0.806844	9.45164	2.12828	16.7176	-2.97361	-3.5502	-4.29213	1.76965e-05	0.000925647	0.000925647	TRUE	up	miR-21
comp70821_c0	4267	685.7	6781.66	2.61741	30.6906	13.6389	107.236	-2.97499	-3.55159	-10.8725	1.55912e-27	5.20704e-25	5.20704e-25	TRUE	up	miR-223, let-7i, novel-154
comp65230_c0	3268	536.99	5323.5	2.67635	31.4562	10.681	84.1787	-2.97841	-3.555	-9.63647	5.6085e-22	1.50872e-19	1.50872e-19	TRUE	up	miR-223
comp64053_c0	3767	3149.12	31795.7	13.6161	162.991	62.6376	502.774	-3.00481	-3.58141	-23.619	2.45884e-123	2.75462e-120	2.75462e-120	TRUE	up	miR-142a-3p
comp66018_c0	3561	118	1231	0.539721	6.6754	2.34708	19.4654	-3.05197	-3.62857	-4.66984	3.01432e-06	0.0001821	0.0001821	TRUE	up	miR-217
comp45587_c0	2420	145	1543.98	0.975915	12.3202	2.88412	24.4144	-3.08153	-3.65813	-5.24558	1.55795e-07	1.16751e-05	1.16751e-05	TRUE	up	miR-142a-3p
comp47085_c0	2944	606	6730.96	3.3527	44.15	12.0536	106.434	-3.14242	-3.71902	-11.018	3.12833e-28	1.08151e-25	1.08151e-25	TRUE	up	miR-223
comp62739_c0	1687	147	1638.01	1.41926	18.7496	2.9239	25.9013	-3.14706	-3.72365	-5.43763	5.39932e-08	4.38803e-06	4.38803e-06	TRUE	up	miR-217
comp68933_c0	1639	170	1897.07	1.68939	22.3509	3.38139	29.9977	-3.14917	-3.72576	-5.85303	4.82696e-09	4.55924e-07	4.55924e-07	TRUE	up	miR-21
comp40167_c0	3048	131.01	1515.27	0.700082	9.59989	2.60586	23.9605	-3.20083	-3.77742	-5.25625	1.4702e-07	1.10927e-05	1.10927e-05	TRUE	up	novel-3
comp69589_c4	4474	193	2327.12	0.702621	10.0442	3.83887	36.798	-3.26087	-3.83747	-6.54895	5.7942e-11	6.66846e-09	6.66846e-09	TRUE	up	novel-154
comp68805_c0	8039	108	1320.59	0.218817	3.17218	2.14818	20.882	-3.28108	-3.85768	-4.94203	7.7313e-07	5.18759e-05	5.18759e-05	TRUE	up	miR-217
comp45085_c0	2215	830.05	10441	6.10366	91.0245	16.5101	165.1	-3.32191	-3.89851	-13.9445	3.40025e-44	1.65348e-41	1.65348e-41	TRUE	up	miR-21
comp55467_c0	2209	560	7344.07	4.12907	64.1996	11.1387	116.129	-3.38208	-3.95868	-11.7522	6.87972e-32	2.5691e-29	2.5691e-29	TRUE	up	miR-217
comp69546_c0	4006	117	1543.12	0.475701	7.43841	2.32719	24.4008	-3.39027	-3.96687	-5.39046	7.02771e-08	5.60337e-06	5.60337e-06	TRUE	up	let-7i, miR-223, novel-154, novel-3
comp70330_c6	3946	318	4197.8	1.31259	20.5426	6.32518	66.3784	-3.39153	-3.96813	-8.89166	6.02008e-19	1.32207e-16	1.32207e-16	TRUE	up	novel-217, novel-223, novel-3
comp70950_c5	2713	140.01	1901.29	0.84056	13.5329	2.78487	30.0645	-3.43238	-4.00897	-6.00299	1.93721e-09	1.94387e-07	1.94387e-07	TRUE	up	miR-21
comp53915_c0	736	73	997.83	1.61549	26.18	1.45201	15.7784	-3.44183	-4.01842	-4.35193	1.34945e-05	0.000725139	0.000725139	TRUE	up	miR-223
comp69953_c1	7904	216	2958.26	0.445109	7.22738	4.29635	46.778	-3.44465	-4.02124	-7.49491	6.63462e-14	9.75389e-12	9.75389e-12	TRUE	up	miR-21, miR-217, miR-223, novel-115
comp52932_c0	1693	73	1048	0.702304	11.9535	1.45201	16.5717	-3.5126	-4.08919	-4.48322	7.35244e-06	0.000417124	0.000417124	TRUE	up	miR-21, miR-217
comp64239_c0	2215	207	3260.79	1.52215	28.4276	4.11734	51.5618	-3.64652	-4.22312	-7.97976	1.4662e-15	2.50993e-13	2.50993e-13	TRUE	up	miR-217
comp71298_c0	13651	361	6051.32	0.430727	8.56006	7.18047	95.6875	-3.73618	-4.31278	-10.9303	8.25719e-28	2.81072e-25	2.81072e-25	TRUE	up	miR-217, miR-223
comp64826_c0	4713	92	1603.93	0.317943	6.57172	1.82993	25.3624	-3.79283	-4.36943	-5.64547	1.64733e-08	1.45794e-06	1.45794e-06	TRUE	up	novel-154
comp71516_c8	3031	80	1446.41	0.429896	9.21503	1.59124	22.8716	-3.84533	-4.42193	-5.37637	7.60045e-08	5.98454e-06	5.98454e-06	TRUE	up	novel-3
comp67311_c3	2604	90	1692.35	0.562939	12.5499	1.79015	26.7606	-3.90196	-4.47856	-5.83248	5.46108e-09	5.1308e-07	5.1308e-07	TRUE	up	miR-21, miR-217, novel-154
comp67481_c0	4259	100	2098.99	0.38243	9.51687	1.98905	33.1906	-4.06062	-4.63722	-6.54323	6.0203e-11	6.91069e-09	6.91069e-09	TRUE	up	novel-3
comp68990_c0	4285	37	999.33	0.140641	4.50349	0	15.8021	-4.42436	-5.00096	-4.57154	4.84162e-06	0.000282837	0.000282837	TRUE	up	novel-3, miR-217
comp71215_c0	2138	59	1685.6	0.449473	15.2243	1.17354	26.6538	-4.5054	-5.082	-5.94933	2.69247e-09	2.65654e-07	2.65654e-07	TRUE	up	miR-223, novel-154
comp69200_c0	2375	131	3928.78	0.898395	31.9437	2.60566	62.1245	-4.57544	-5.15204	-9.09692	9.29275e-20	2.15863e-17	2.15863e-17	TRUE	up	miR-217
comp70305_c0	2608	42	1282.5	0.262302	9.49601	0	20.2797	-4.60143	-5.17802	-5.20022	1.99052e-07	1.45833e-05	1.45833e-05	TRUE	up	novel-3
comp56792_c0	3022	602	19314.3	3.2446	123.417	11.9741	305.411	-4.67276	-5.24936	-20.2078	8.36191e-91	7.55157e-88	7.55157e-88	TRUE	up	miR-223, novel-3
comp62774_c0	2585	131.86	4721.94	0.83083	35.2737	2.62276	74.6664	-4.8313	-5.4079	-10.0143	1.31905e-23	3.82753e-21	3.82753e-21	TRUE	up	novel-154
comp71571_c1	2268	26	1082	0.18672	9.21246	0	17.1093	-5.04805	-5.62464	-4.80204	1.57056e-06	9.94981e-05	9.94981e-05	TRUE	up	miR-217
comp60914_c0	3531	27	1350	0.124545	7.38291	0	21.3471	-5.31286	-5.88945	-5.36451	8.11674e-08	6.3459e-06	6.3459e-06	TRUE	up	novel-154
comp70775_c1	2424	8	1453	0.0537548	11.5751	0	22.9758	-7.17382	-7.75042	-5.30511	1.12603e-07	8.62087e-06	8.62087e-06	TRUE	up	miR-142a-3p, miR-217, novel-3
comp70246_c1	7740	30.01	8491	0.0631516	21.1841	0	134.265	-7.81335	-8.38994	-12.4265	1.87759e-35	7.76506e-33	7.76506e-33	TRUE	up	miR-142a-3p
